# Supplementary material
Source: MDPI journal article supplement (https://www.mdpi.com/2227-9717/11/12/3397)
Supplement: s1 [file s1]

# Comparative life cycle environmental impact assessments of fruit and vegetable waste valorization in a Mediterranean market

Ángeles Trujillo-Reyes <sup>1,2</sup>, Elena Jiménez-Páez <sup>1,3</sup>, Antonio Serrano <sup>2,4</sup>, Ghada Kassab <sup>5</sup>, Fernando G. Feroso <sup>1,\*</sup> and Bernabé Alonso-Fariñas <sup>3</sup>

<sup>1</sup> Instituto de la Grasa, Spanish National Research Council (CSIC), Campus Universitario Pablo de Olavide, Ed. 46, Ctra. De Utrera, km. 1, 41013 Seville, Spain; angeles.trujillo@ugr.es (Á.T.-R.); elena.jimenez@ig.csic.es (E.J.-P.)

<sup>2</sup> Institute of Water Research, University of Granada, Ed. Fray Luis, nº 4, 18071 Granada, Spain; antonio.serrano@ugr.es

<sup>3</sup> Departamento de Ingeniería Química y Ambiental, Escuela Técnica Superior de Ingeniería, Universidad de Sevilla, Camino de los Descubrimientos s/n, 41092 Seville, Spain; bernabeaf@us.es

<sup>4</sup> Department of Microbiology, Pharmacy Faculty, University of Granada, Campus de Cartuja s/n, 18071 Granada, Spain

<sup>5</sup> Department of Civil Engineering, University of Jordan, 11942 Amman, Jordan; ghada.kassab@ju.edu.jo

\* Correspondence: fgferoso@ig.csic.es; Tel.: +34-954611550

## Supplementary material

### 1. Landfill disposal (LC) inventory data

Landfill stage: This section is shown in *section 2.2.1* in the paper. The IPCC method, developed for solid waste disposal (SWDS), was used to calculate the amount of methane emitted at the landfill [1, 2]. Among the three described levels for assessing CH<sub>4</sub> emissions from SWDS, this study used the Tier 1 FOD method, which mainly uses default activity data and parameters, for determining methane emissions at the landfill [2]. Methane emissions from SWDS during a single year can be estimated with Equation 1 (Eq. 1). Methane is generated due to the decomposition of organic matter under anaerobic conditions. Some of the generated methane is oxidised in the SWDS cover or can be recovered for energy or flaring. The amount of methane emitted from SWDS can be calculates as:

$$\text{CH}_4 \text{ Emissions} = \left[ \sum_x \text{CH}_4 \text{ generated}_{x,T} - R_T \right] \cdot (1 - \text{OX}_T) \quad (\text{Eq. 1})$$

where CH<sub>4</sub> emissions is the CH<sub>4</sub> emitted in year T, expressed in Gg; T is the inventory year; X is the waste category or type/material; R<sub>T</sub> is the recovered CH<sub>4</sub> in year T, expressed in Gg; OX<sub>T</sub> is the oxidation factor in year T, expressed in fraction.

The base for the calculation of methane generation is the amount of degradable organic carbon (DOC) as defined in Equation 2 (Eq. 2).

$$\text{DDOC}_m = W \cdot \text{DOC} \cdot \text{DOC}_F \cdot \text{MCF} \quad (\text{Eq. 2})$$

where DDOC<sub>m</sub> is the mass of decomposable DOC deposited, expressed in Gg; W is the amount of waste deposited in the landfill per year, expressed in Gg; DOC is degradable organic carbon

in a year of deposition, expressed in Gg C/Gg waste;  $DOC_F$  corresponds to a fraction of DOC that decomposes under anaerobic conditions expressed in fraction; MCF is the  $CH_4$  correction factor for aerobic decomposition in the year of deposition, expressed in fraction.

Therefore, to determine the methane quantity generated from the waste that can be decomposed, the fraction of  $CH_4$  contained in the generated landfill gas is multiplied by the quotient of the molecular weights  $CH_4/C$  (Eq. 3).

$$CH_4\text{generated}_T = DDOC_m \cdot F \cdot \frac{16}{12} \quad (\text{Eq. 3})$$

where  $CH_4\text{generated}_T$  is the amount of  $CH_4$  generated from decomposable material;  $DDOC_m$  is the mass of decomposable DOC deposited, expressed in Gg;  $F$  is the fraction of  $CH_4$ , by volume, ingenerated landfill gas, expressed in fraction;  $16/12$  is the molecular weight ratio  $CH_4/C$ .

The emission factors and parameters were chosen according to the recommended default value:

- The amount of waste deposited in the landfill per year ( $W$ ) was 1.64 Gg FVW per year.
- The DOC value was 0.070 Gg per Gg FVW.
- The recommended default value chosen for  $DOC_F$  was 0.7 [2], assuming that the waste for which this assessment is being developed is considered a highly decomposable waste since it belongs to food waste.
- The MCF accounts for the fact that, for a given amount of waste, unmanaged SWDS produce less  $CH_4$  than managed anaerobic SWDS. Of all the MCF values assigned, it has been considered that the MCF that best fits the conditions of the landfill studied is 0.5 [2], since it corresponds to a semi-aerobic managed solid waste landfill site [3].
- The  $CH_4$  fraction ( $F$ ) value in the landfill gas was recommended to be 0.5 [2].
- The oxidation factor ( $OX$ ) reflects the amount of  $CH_4$  oxidised in the soil or other waste material. The amount of methane oxidised in the soil was unknown, so the value was assumed to be zero.
- At the Al Ghabawi landfill, as reported by Hadjidimoulas [3], 75% of the methane generated is therefore recovered. The methane generated per year was 0.027 Gg  $CH_4$  and the methane emissions were 18.3 kg  $CH_4/d$ .

## References

- [1] IPCC, in: H.S. Eggleston, L. Buendia, K. Miwa, T. Ngara, K. Tanabe (Eds.), 2006 IPCC Guidelines for National Greenhouse Gas Inventories, Prepared by the National Greenhouse Gas Inventories Programme, Published: IGES, Japan, 2006.
- [2] IPCC, in: E. Calvo Buendia, K. Tanabe, A. Kranjc, J. Baasansuren, M. Fukunda, S. Ngarize, A. Osako, Y. Pyrozhenko, P. Shermanau, S. Federici (Eds.), 2019 Refinement to the 2006 IPCC Guidelines for National Greenhouse Gas Inventories, Published: IPCC, Switzerland, 2019.
- [3] C. Hadjidimoulas, Methane Gas Emissions: Methods of Improving the Efficiency of the Biggest Landfill Gas Waste to Energy Project in the Middle East Installed in Amman, Jordan, Open Access Library Journal 5(8) (2018) 1-35.

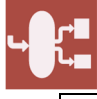**Table S1.** Environmental impacts result for all impacts categories assessed using the ReCiPe 2016 Midpoint (H) method for landfill disposal.

| Impact category                                                |        |      |       |           |        |                  | Avoid impact     |  |
|----------------------------------------------------------------|--------|------|-------|-----------|--------|------------------|------------------|--|
|                                                                | Total  | FV   | WCT   | Transport | Cells  | Electricity, mix | Electricity, mix |  |
| Global warming (kg CO <sub>2</sub> eq)                         | 645.66 | 0.00 | 141.2 | 45.69     | 586.91 | 1.24             | -129.47          |  |
| Stratospheric ozone depletion (kg CFC11 eq)                    | 0.00   | 0.00 | 0.00  | 0.00      | 0.00   | 0.00             | 0.00             |  |
| Ionizing radiation (kBq Co-60 eq)                              | 1.51   | 0.00 | 1.20  | 0.40      | 0.00   | 0.18             | -0.27            |  |
| Ozone formation, Human health (kg NO <sub>x</sub> eq)          | 0.04   | 0.00 | 0.07  | 0.12      | 0.00   | 0.00             | -0.15            |  |
| Fine particulate matter formation (kg PM2.5 eq)                | 0.03   | 0.00 | 0.05  | 0.03      | 0.00   | 0.00             | -0.06            |  |
| Ozone formation, terrestrial ecosystem (kg NO <sub>x</sub> eq) | 0.01   | 0.00 | 0.07  | 0.12      | 0.00   | 0.00             | -0.15            |  |
| Terrestrial acidification (kg SO <sub>2</sub> eq)              | 0.07   | 0.00 | 0.15  | 0.09      | 0.00   | 0.01             | -0.18            |  |
| Freshwater eutrophication (kg P eq)                            | 0.00   | 0.00 | 0.00  | 0.00      | 0.00   | 0.00             | 0.00             |  |
| Marine eutrophication (kg N eq)                                | 2.93   | 0.00 | 0.00  | 0.00      | 0.00   | 0.00             | 0.00             |  |
| Terrestrial ecotoxicity (kg 1,4-DBC)                           | 579.01 | 0.00 | 28.89 | 600.10    | 0.00   | 0.37             | -80.35           |  |
| Freshwater ecotoxicity (kg 1,4-DBC)                            | 0.23   | 0.00 | 0.14  | 0.13      | 0.00   | 0.00             | -0.04            |  |
| Marine ecotoxicity (kg 1,4-DBC)                                | 0.60   | 0.00 | 0.23  | 0.48      | 0.00   | 0.00             | -0.10            |  |
| Human carcinogenic toxicity (kg 1,4-DBC)                       | 0.03   | 0.00 | 0.09  | 0.04      | 0.00   | 0.00             | -0.09            |  |
| Human non-carcinogenic toxicity (kg 1,4-DBC)                   | 12.19  | 0.00 | 4.81  | 9.47      | 0.00   | 0.03             | -2.11            |  |
| Land use (m <sup>2</sup> a crop eq)                            | 0.55   | 0.00 | 0.59  | 0.20      | 0.00   | 0.00             | -0.24            |  |
| Mineral resource scarcity (Kg Cu eq)                           | 0.01   | 0.00 | 0.01  | 0.00      | 0.00   | 0.00             | 0.00             |  |
| Fossil resource scarcity (Kg oil eq)                           | 7.92   | 0.00 | 44.61 | 14.86     | 0.00   | 0.21             | -51.76           |  |
| Water consumption (m <sup>3</sup> )                            | -0.23  | 0.00 | 0.00  | 0.00      | 0.00   | 0.00             | -0.23            |  |

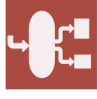**Table S2.** Environmental impacts result for all impacts categories assessed using the ReCiPe 2016 Midpoint (H) method for AD and composting plant.

| Impact category                                                | Avoid impact |      |         |           |         |                      |                  |
|----------------------------------------------------------------|--------------|------|---------|-----------|---------|----------------------|------------------|
|                                                                | Total        | FVW  | Turning | Transport | Compost | Liquid biofertiliser | Electricity, mix |
| Global warming (kg CO <sub>2</sub> eq)                         | -1436.08     | 0.00 | 3.48    | 11.18     | -560.43 | -239.01              | -618.33          |
| Stratospheric ozone depletion (kg CFC11 eq)                    | -0.02        | 0.00 | 0.00    | 8.21      | -0.01   | -0.01                | 0.00             |
| Ionizing radiation (kBq Co-60 eq)                              | -5.49        | 0.00 | 0.03    | 0.10      | -2.90   | -1.24                | -1.30            |
| Ozone formation, Human health (kg NO <sub>x</sub> eq)          | -2.27        | 0.00 | 0.04    | 0.03      | -1.09   | -0.47                | -0.71            |
| Fine particulate matter formation (kg PM2.5 eq)                | -0.86        | 0.00 | 0.21    | 0.01      | -0.55   | -0.27                | -0.27            |
| Ozone formation, terrestrial ecosystem (kg NO <sub>x</sub> eq) | -2.29        | 0.00 | 0.04    | 0.03      | -1.10   | -0.47                | -0.72            |
| Terrestrial acidification (kg SO <sub>2</sub> eq)              | -2.19        | 0.00 | 1.68    | 0.02      | -2.05   | -0.87                | -0.85            |
| Freshwater eutrophication (kg P eq)                            | -0.03        | 0.00 | 0.00    | 0.00      | -0.02   | -0.01                | 0.00             |
| Marine eutrophication (kg N eq)                                | -0.02        | 0.00 | 0.00    | 0.00      | -0.01   | -0.01                | 0.00             |
| Terrestrial ecotoxicity (kg 1,4-DBC)                           | -1456.94     | 0.00 | 4.54    | 146.69    | -822.45 | -350.75              | -386.60          |
| Freshwater ecotoxicity (kg 1,4-DBC)                            | -9.34        | 0.00 | 0.01    | 0.03      | -6.19   | -2.64                | -0.18            |
| Marine ecotoxicity (kg 1,4-DBC)                                | -12.85       | 0.00 | 0.01    | 0.12      | -8.40   | -3.58                | -0.50            |
| Human carcinogenic toxicity (kg 1,4-DBC)                       | -3.60        | 0.00 | 0.00    | 0.01      | -2.13   | -0.91                | -0.44            |
| Human non-carcinogenic toxicity (kg 1,4-DBC)                   | -367.33      | 0.00 | 17.78   | 2.31      | -254.00 | -108.32              | -10.16           |
| Land use (m <sup>2</sup> a crop eq)                            | -129.72      | 0.00 | 0.02    | 0.05      | -86.60  | -36.93               | -1.16            |
| Mineral resource scarcity (Kg Cu eq)                           | -2.15        | 0.00 | 0.00    | 0.00      | -1.45   | -0.62                | 0.00             |
| Fossil resource scarcity (Kg oil eq)                           | -353.59      | 0.00 | 1.11    | 3.63      | -73.59  | -31.38               | -249.03          |
| Water consumption (m <sup>3</sup> )                            | -8.25        | 0.00 | 0.00    | 0.00      | -4.80   | -2.05                | -1.13            |
